# Supplementary material for: Whey Protein Supplementation Enhances Whole Body Protein Metabolism and Performance Recovery after Resistance Exercise: A Double-Blind Crossover Study
Source: MDPI journal article supplement (doi:10.3390/nu9070735), 2017-07-11
Supplement: s1 [file s1]

Supplemental Table S1. *Participant anthropometric and habitual dietary characteristics*

| <b>Participant characteristics</b>    |            |
|---------------------------------------|------------|
| <b><i>Anthropometrics</i></b>         |            |
| Age (y)                               | 24.3 ± 4.5 |
| Height (m)                            | 1.76 ± 0.6 |
| Body weight (kg)                      | 76.2 ± 8.0 |
| Body fat (%)                          | 14.3 ± 4.6 |
| Fat-free mass (kg)                    | 65.1 ± 6.2 |
| <b><i>Dietary characteristics</i></b> |            |
| Protein (g/d)                         | 143 ± 16   |
| Relative protein (g/kg/d)             | 1.9 ± 0.3  |
| Carbohydrate (g/d)                    | 366 ± 63   |
| Fat (g/d)                             | 78 ± 11    |
| Total energy (kcal)                   | 2734 ± 220 |
| <b><i>% of total energy</i></b>       |            |
| Protein                               | 21 ± 2     |
| Carbohydrate (g/d)                    | 53 ± 9     |
| Fat (g/d)                             | 26 ± 4     |

Supplemental Table S2. Post-exercise performance recovery

| % change from post-exercise (90% confidence interval) |      |                 |      |                 |      |                 |      |                |
|-------------------------------------------------------|------|-----------------|------|-----------------|------|-----------------|------|----------------|
|                                                       | % Δ  | 10 h recovery   |      |                 | % Δ  | 24 h recovery   |      |                |
|                                                       |      | CHO             |      | PRO             |      | CHO             |      | PRO            |
|                                                       |      | (90% CI)        | % Δ  | (90% CI)        |      | (90% CI)        | % Δ  | (90% CI)       |
| <i>Knee extension</i>                                 |      |                 |      |                 |      |                 |      |                |
| Peak isometric force                                  | 4.3  | (-0.5 to 9.2)   | 9.7  | (2.9 to 16.5)   | 15.1 | (10.4 to 19.7)  | 25.0 | (15.6 to 34.3) |
| Repetitions to failure*                               | 0.7  | (-0.6 to 2.0)   | 1.0  | (-0.2 to 2.1)   | 2.3  | (0.3 to 4.3)    | 3.3  | (0.9 to 5.7)   |
| <i>Wingate test</i>                                   |      |                 |      |                 |      |                 |      |                |
| Peak power                                            | -1.3 | (-3.4 to 0.7)   | 0.6  | (-3.3 to 4.4)   | 3.9  | (-2.1 to 9.9)   | 9.3  | (4.0 to 14.6)  |
| Mean power                                            | -1.4 | (-3.6 to 0.9)   | 0.3  | (-3.5 to 4)     | 4.4  | (0.8 to 8.1)    | 5.3  | (2.1 to 8.6)   |
| <b>CMJ Outcome</b>                                    |      |                 |      |                 |      |                 |      |                |
| <i>Jump height</i>                                    | 1.1  | (-3.1 to 5.3)   | 3.9  | (0.8 to 6.9)    | 10.1 | (5.6 to 14.5)   | 8.6  | (4.5 to 12.8)  |
| <i>Force</i>                                          |      |                 |      |                 |      |                 |      |                |
| Mean force (CON)                                      | -2.2 | (-0.1 to -4.3)  | -2.4 | (-3.3 to -1.5)  | 2.7  | (-0.5 to 5.8)   | -0.3 | (-1.7 to 1.0)  |
| Max RFD                                               | 1.6  | (-13.2 to 16.4) | 15.6 | (-10.4 to 41.6) | 12.7 | (-7.1 to 32.4)  | 15.2 | (-2.8 to 32.9) |
| Total impulse (CON)                                   | -3.7 | (-6.4 to -1.1)  | 1.2  | (-5.5 to 7.9)   | 3.8  | (-1.0 to 8.6)   | 3.8  | (-2.4 to 10.0) |
| Peak force                                            | -1.3 | (-4.2 to 1.5)   | -1.8 | (-3.9 to 0.3)   | 1.4  | (-2.4 to 5.3)   | 0.8  | (-2.4 to 4.0)  |
| Force-Vel. AUC (ECC)                                  | -4.9 | (-15.7 to 5.8)  | 3.7  | (-9.8 to 17.3)  | -1.0 | (-12.9 to 10.9) | 9.6  | (-7.5 to 26.8) |
| <i>Velocity</i>                                       |      |                 |      |                 |      |                 |      |                |
| Peak velocity                                         | -2.3 | (-6.3 to 1.6)   | 1.9  | (-5.7 to 9.6)   | 4.4  | (-1.4 to 10.2)  | 3.8  | (-3.0 to 10.6) |
| Take-off velocity                                     | -1.9 | (-5.8 to 2.0)   | 2.9  | (-5.1 to 10.9)  | 5.6  | (-0.5 to 11.7)  | 4.6  | (-2.7 to 11.8) |
| Mean velocity (CON)                                   | -3.8 | (-8.5 to 0.9)   | 0.4  | (-7.2 to 8.1)   | 5.8  | (-1.3 to 12.9)  | 2.9  | (-3.2 to 9.0)  |
| Peak ECC (pre-load) velocity                          | -1.8 | (-6.2 to 2.7)   | 3.1  | (-4.5 to 10.8)  | -0.8 | (-5.0 to 3.4)   | 4.3  | (-0.7 to 9.3)  |
| <i>Power &amp; Kinetic Energy</i>                     |      |                 |      |                 |      |                 |      |                |
| Peak power                                            | -2.6 | (-6.4 to 1.2)   | 1.1  | (-6.7 to 9)     | 6.2  | (-0.2 to 12.5)  | 2.6  | (-4.1 to 9.4)  |
| Time to peak power                                    | 3.5  | (-0.6 to 7.6)   | -2.9 | (-7.3 to 1.6)   | 1.3  | (-5.6 to 8.1)   | -1.9 | (-6.9 to 3.1)  |
| Kinetic energy at take-off                            | 0.96 | (0.89 to 1.02)  | 1.06 | (0.91 to 1.21)  | 1.12 | (1.01 to 1.23)  | 1.11 | (0.96 to 1.26) |
| <i>Neuromuscular strategy</i>                         |      |                 |      |                 |      |                 |      |                |
| Concentric duration                                   | 0.4  | (-3.6 to 4.4)   | 5.0  | (-0.9 to 10.8)  | -2.1 | (-6.9 to 2.6)   | 6.8  | (-0.1 to 13.7) |
| Eccentric duration                                    | 3.0  | (-2.0 to 7.9)   | -4.6 | (-11.4 to 2.1)  | 2.5  | (-5.0 to 10.0)  | -4.7 | (-11.5 to 2.1) |
| Total duration                                        | 2.7  | (-1.0 to 6.3)   | -3.0 | (-7.2 to 1.2)   | 0.6  | (-5.8 to 7.0)   | -2.2 | (-6.9 to 2.6)  |
